# Supplementary material for: Fabrication of ultrathin solid electrolyte membranes of β-Li3PS4 nanoflakes by evaporation-induced self-assembly for all-solid-state batteries
Source: Royal Society of Chemistry journal article supplement (doi:10.1039/c6ta02294d), 2016-01-01
Supplement: c6ta02294d1.pdf [file c6ta02294d1.pdf]

## Supporting Information

### Fabrication of Ultrathin Solid Electrolyte Membranes of $\beta$ -Li<sub>3</sub>PS<sub>4</sub> Nanoflakes by Evaporation-Induced Self-Assembly for All-Solid-State Batteries

Hui Wang,<sup>1,\*</sup> Zachary D. Hood,<sup>1,2</sup> Younan Xia,<sup>2,3,4</sup> Chengdu Liang<sup>1,\*</sup>

<sup>1</sup> Center for Nanophase Materials Sciences, Oak Ridge National Laboratory, Oak Ridge, TN 37831, USA

<sup>2</sup> School of Chemistry and Biochemistry, Georgia Institute of Technology, Atlanta, Georgia, 30332, USA

<sup>3</sup> Wallace H. Coulter Department of Biomedical Engineering, Georgia Institute of Technology and Emory University, Atlanta, GA 30332, USA

<sup>4</sup> School of Chemical and Biomolecular Engineering, Georgia Institute of Technology, Atlanta, GA 30332, USA

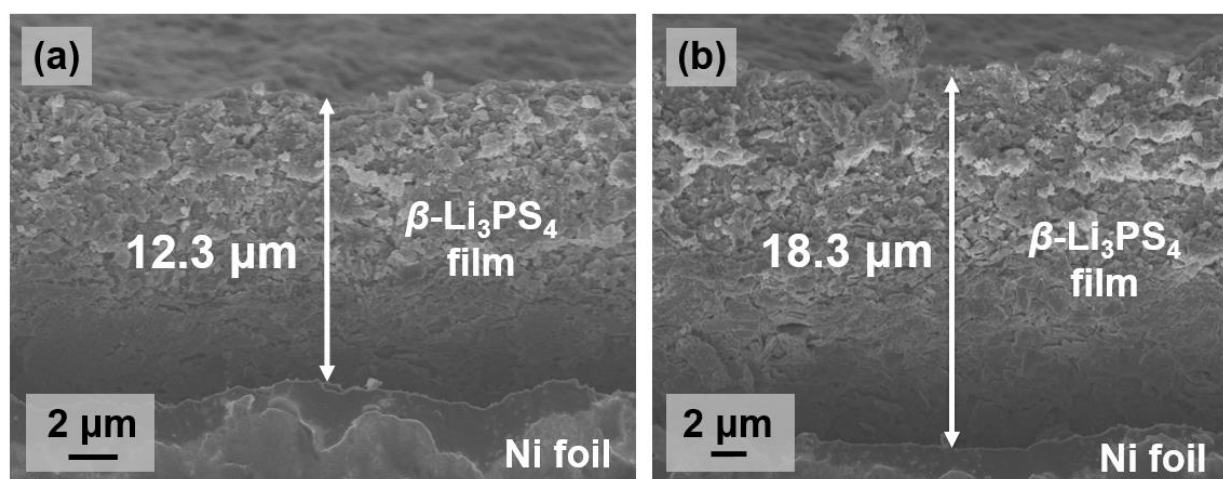

**Figure S1.** SEM cross-sectional images of  $\beta$ -Li<sub>3</sub>PS<sub>4</sub> thin membranes produced by EISA, which have a thickness of a)  $\sim 12\ \mu\text{m}$  and b)  $\sim 18\ \mu\text{m}$ .

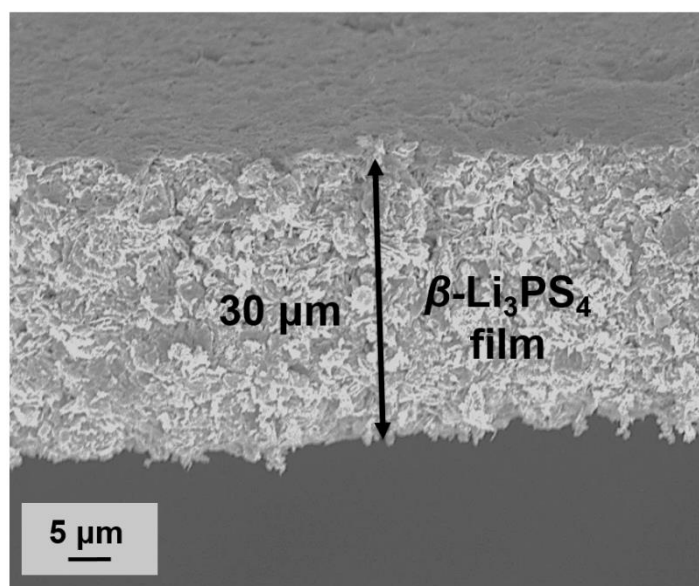

**Figure S2.** SEM cross-sectional image of freestanding 30 μm  $\beta$ -Li<sub>3</sub>PS<sub>4</sub> membrane produced by EISA.
